# Supplementary material for: Effectiveness of enhanced cognitive behavior therapy for eating disorders: A randomized controlled trial
Source: PubMed Central journal article supplement — Int J Eat Disord. 2020 Feb 10;53(5):717–27. doi: 10.1002/eat.23239 (PMC7317943; doi:10.1002/eat.23239), 2020-02-10
Supplement: EAT-53-717-s002.pdf [file EAT-53-717-s002.pdf]

Table S1. *Estimates for Generalized Estimating Equations regarding SCID I diagnosis*

|              | Estimate | SE   | Odds ratio | 95% CI |       |
|--------------|----------|------|------------|--------|-------|
|              |          |      |            | Upper  | Lower |
| (Intercept)  | -3,08    | 0,29 | 0,05       | 0,03   | 0,08  |
| Time         | 0,85     | 0,08 | 2,33       | 1,98   | 2,74  |
| CBT-E        | 0,28     | 0,37 | 1,33       | 0,64   | 2,77  |
| Time x CBT-E | 0,01     | 0,11 | 1,01       | 0,81   | 1,26  |

Note: <sup>a</sup> The Hague as reference category

SCID I = Structured Clinical Interview for DSM Axis-I Disorders,  
 CBT-E = cognitive behavior therapy enhanced

Table S2. Overall *F* test statistics for model parameters in mixed models

|                | <i>df</i> 1 | <i>df</i> 2 | <i>F</i> | <i>p</i> |
|----------------|-------------|-------------|----------|----------|
| <b>EDE-Q</b>   |             |             |          |          |
| Intercept      | 1           | 441         | 2147,89  | <.001    |
| Time           | 4           | 441         | 51,66    | <.001    |
| CBT-E          | 1           | 141         | 0,02     | 0,90     |
| Time x CBT-E   | 4           | 441         | 2,85     | 0,02     |
| <b>RSE</b>     |             |             |          |          |
| Intercept      | 1           | 452         | 3660,84  | <.001    |
| Time           | 4           | 452         | 20,14    | <.001    |
| CBT-E          | 1           | 141         | 0,59     | 0,44     |
| Time x CBT-E   | 4           | 452         | 2,49     | 0,04     |
| <b>F-MPS</b>   |             |             |          |          |
| Intercept      | 1           | 446         | 2354,79  | <.001    |
| Time           | 4           | 446         | 5,03     | 0,001    |
| CBT-E          | 1           | 141         | 0,00     | 0,99     |
| Time x CBT-E   | 4           | 446         | 1,71     | 0,15     |
| <b>IIP-32</b>  |             |             |          |          |
| Intercept      | 1           | 445         | 827,38   | <.001    |
| Time           | 4           | 445         | 13,17    | <.001    |
| CBT-E          | 1           | 141         | 4,19     | 0,04     |
| Time x CBT-E   | 4           | 445         | 1,73     | 0,14     |
| <b>MASQ NA</b> |             |             |          |          |
| Intercept      | 1           | 456         | 664,84   | <.001    |
| Time           | 4           | 456         | 17,57    | <.001    |
| CBT-E          | 1           | 141         | 0,78     | 0,38     |
| Time x CBT-E   | 4           | 456         | 0,34     | 0,85     |
| <b>MASQ PA</b> |             |             |          |          |
| Intercept      | 1           | 456         | 836,65   | <.001    |
| Time           | 4           | 456         | 13,30    | <.001    |
| CBT-E          | 1           | 141         | 1,97     | 0,16     |
| Time x CBT-E   | 4           | 456         | 0,62     | 0,65     |
| <b>MASQ SA</b> |             |             |          |          |
| Intercept      | 1           | 456         | 214,56   | <.001    |
| Time           | 4           | 456         | 11,84    | <.001    |
| CBT-E          | 1           | 141         | 0,33     | 0,56     |
| Time x CBT-E   | 4           | 456         | 0,67     | 0,61     |

CBT-E = cognitive behavior therapy enhanced,

EDE-Q = Eating Disorder Examination-Questionnaire,

RSE = Rosenberg Self-Esteem Scale, F-MPS = Frost Multidimensional Perfectionism Scale,

IIP-32 = Inventory of Interpersonal Problems, MASQ = Mood and Anxiety Symptom Questionnaire,

NA = negative affect, PA = positive affect, SA = somatic anxiety

Table S3. Overall *F* test statistics for model parameters in mixed model for IIP-32 in per protocol analyses

|              | <i>df1</i> | <i>df2</i> | <i>F</i> | <i>p</i> |
|--------------|------------|------------|----------|----------|
| Intercept    | 1          | 381        | 653,64   | <.001    |
| Time         | 4          | 381        | 12,86    | <.001    |
| CBT-E        | 1          | 109        | 1,69     | 0,20     |
| Time x CBT-E | 4          | 381        | 3,29     | 0,01     |

IIP-32 = Inventory of Interpersonal Problems, CBT-E = cognitive behavior therapy enhanced

Table S4. *Fixed effects for mixed model with IIP-32 in per protocol analysis*

|              | Estimate | SE   | df  | t     | p     |
|--------------|----------|------|-----|-------|-------|
| Intercept    | 1,24     | 0,08 | 381 | 16,17 | <.001 |
| Time         |          |      |     |       |       |
| 6 weeks      | -0,01    | 0,06 | 381 | -0,13 | 0,89  |
| 20 weeks     | -0,10    | 0,07 | 381 | -1,45 | 0,15  |
| 40 weeks     | -0,15    | 0,07 | 381 | -2,31 | 0,02  |
| 80 weeks     | -0,23    | 0,08 | 381 | -2,75 | 0,01  |
| CBT-E        | 0,20     | 0,11 | 109 | 1,78  | 0,08  |
| CBT-E x Time |          |      |     |       |       |
| 6 weeks      | -0,05    | 0,08 | 381 | -0,63 | 0,53  |
| 20 weeks     | -0,25    | 0,10 | 381 | -2,56 | 0,01  |
| 40 weeks     | -0,24    | 0,09 | 381 | -2,56 | 0,01  |
| 80 weeks     | -0,10    | 0,11 | 381 | -0,86 | 0,39  |

IIP-32 = Inventory of Interpersonal Problems, CBT-E = cognitive behavior therapy enhanced

Table S5. Overall *F* test statistics for model parameters in mixed model for EDE-Q with baseline RSE as a moderator. Baseline RSE score was standardized.

|                             | <i>df1</i> | <i>df2</i> | <i>F</i> | <i>p</i> |
|-----------------------------|------------|------------|----------|----------|
| Intercept                   | 1          | 433        | 2895,82  | <.001    |
| Time                        | 4          | 433        | 52,32    | <.001    |
| CBT-E                       | 1          | 139        | 0,06     | 0,81     |
| RSE baseline                | 1          | 139        | 46,97    | <.001    |
| Time x CBT-E                | 4          | 433        | 2,80     | 0,03     |
| Time x RSE baseline         | 4          | 433        | 0,25     | 0,91     |
| CBT-E x RSE baseline        | 1          | 139        | 0,34     | 0,56     |
| Time x CBT-E x RSE baseline | 4          | 433        | 2,56     | 0,04     |

EDE-Q = Eating Disorder Examination-Questionnaire,

RSE = Rosenberg Self-Esteem Scale,

CBT-E = cognitive behavior therapy enhanced

Table S6. *Fixed effects in mixed model for EDE-Q with baseline RSE as a moderator. Baseline RSE score was standardized.*

|                             | Estimate | SE   | df  | t     | p     |
|-----------------------------|----------|------|-----|-------|-------|
| Intercept                   | 4,12     | 0,11 | 433 | 38,44 | <.001 |
| Time                        |          |      |     |       |       |
| 6 weeks                     | -0,51    | 0,10 | 433 | -5,25 | <.001 |
| 20 weeks                    | -1,23    | 0,18 | 433 | -6,80 | <.001 |
| 40 weeks                    | -1,29    | 0,17 | 433 | -7,46 | <.001 |
| 80 weeks                    | -1,78    | 0,20 | 433 | -9,11 | <.001 |
| CBT-E                       | -0,05    | 0,15 | 139 | -0,33 | 0,74  |
| RSE Baseline                | -0,60    | 0,10 | 139 | -5,81 | <.001 |
| CBT-E x Time                |          |      |     |       |       |
| 6 weeks                     | -0,31    | 0,14 | 433 | -2,24 | 0,03  |
| 20 weeks                    | -0,27    | 0,25 | 433 | -1,09 | 0,28  |
| 40 weeks                    | -0,41    | 0,24 | 433 | -1,72 | 0,09  |
| 80 weeks                    | 0,14     | 0,26 | 433 | 0,52  | 0,60  |
| RSE Baseline x Time         |          |      |     |       |       |
| 6 weeks                     | 0,18     | 0,10 | 433 | 1,92  | 0,06  |
| 20 weeks                    | 0,31     | 0,18 | 433 | 1,77  | 0,08  |
| 40 weeks                    | 0,12     | 0,17 | 433 | 0,70  | 0,49  |
| 80 weeks                    | 0,20     | 0,19 | 433 | 1,07  | 0,29  |
| CBT-E x RSE Baseline        | 0,24     | 0,15 | 139 | 1,60  | 0,11  |
| CBT-E x RSE Baseline x Time |          |      |     |       |       |
| 6 weeks                     | -0,32    | 0,14 | 433 | -2,31 | 0,02  |
| 20 weeks                    | -0,38    | 0,25 | 433 | -1,56 | 0,12  |
| 40 weeks                    | -0,02    | 0,24 | 433 | -0,07 | 0,94  |
| 80 weeks                    | -0,25    | 0,27 | 433 | -0,94 | 0,35  |

EDE-Q = Eating Disorder Examination-Questionnaire,

RSE = Rosenberg Self-Esteem Scale,

CBT-E = cognitive behavior therapy enhanced
